# Supplementary material for: Identification and characterization of centromeric sequences in Xenopus laevis
Source: PubMed Central journal article supplement — Genome Res. 2021 Jun;31(6):958–67. doi: 10.1101/gr.267781.120 (PMC8168581; doi:10.1101/gr.267781.120), 2021-06
Supplement: supp_gr.267781.120_Supplemental_Materials.pdf [file supp_gr.267781.120_Supplemental_Materials.pdf]

**Supplemental Material for**  
**Identification and characterization of centromeric sequences in *Xenopus laevis***

Owen K Smith<sup>1,2</sup>, Charles Limouse<sup>1</sup>, Kelsey A Fryer<sup>1,3</sup>, Nicole A Teran<sup>3</sup>, Kousik Sundararajan<sup>1</sup>, Rebecca Heald<sup>4</sup>, Aaron F Straight<sup>1\*</sup>

<sup>1</sup>Department of Biochemistry  
Stanford University School of Medicine  
279 Campus Drive  
Beckman Center 409  
Stanford, CA 94305-5307

<sup>2</sup>Department of Chemical and Systems Biology  
Stanford University School of Medicine  
Stanford, CA 94305

<sup>3</sup>Department of Genetics  
Stanford University School of Medicine  
Stanford, CA 94305-5120

<sup>4</sup>Department of Molecular and Cell Biology  
University of California Berkeley  
142 Life Sciences Addition #3200  
Berkeley, CA 94720-3200

**Contents:**

Supplemental Fig S1-S7

# Fig S1

A

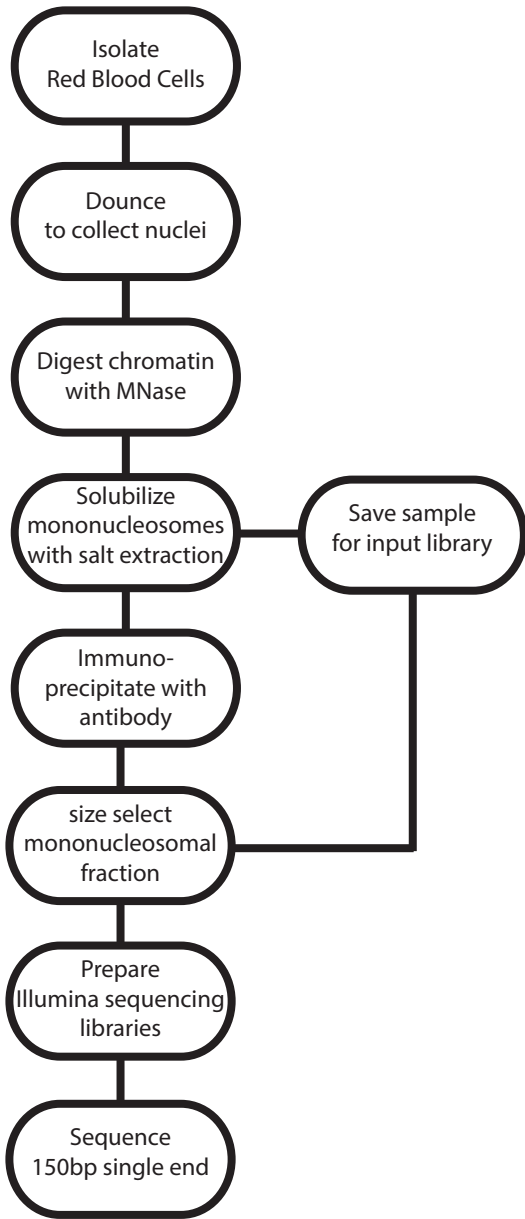

B

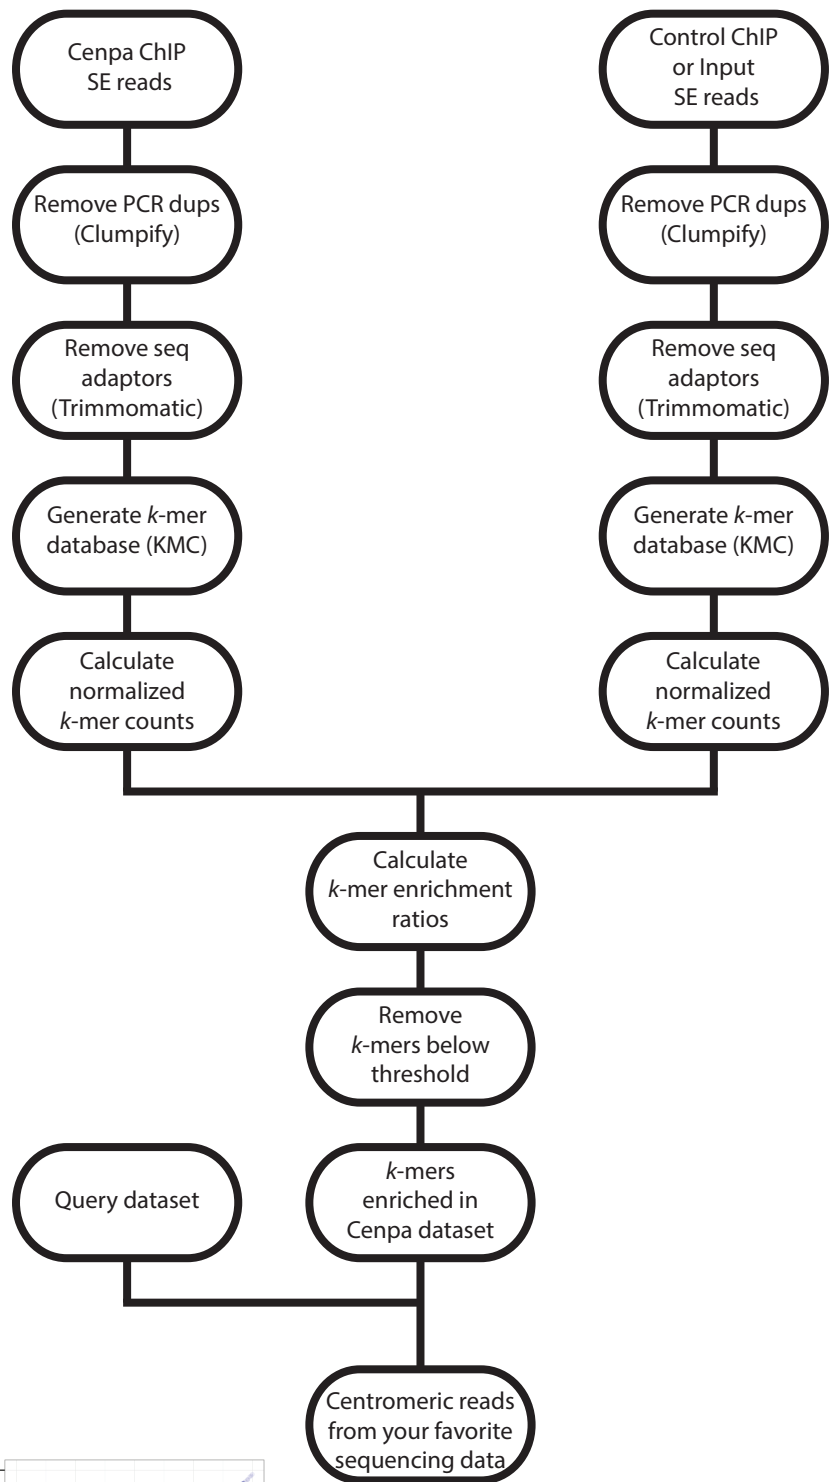

C

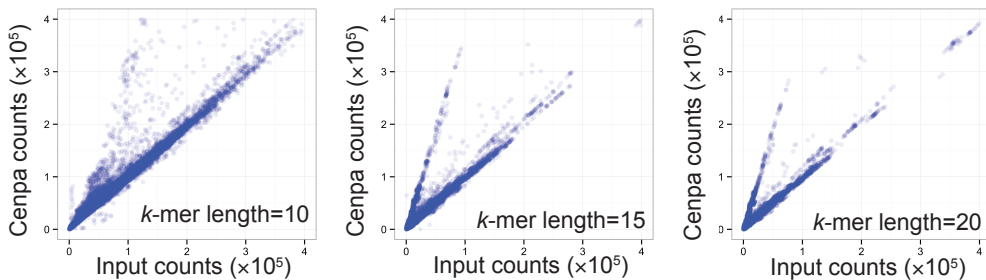

D

| mad $\times$ | % Input | % Cenpa ChIP | CA / IN |
|--------------|---------|--------------|---------|
| 5            | 1.67    | 5.52         | 3.29    |
| 10           | 0.53    | 3.91         | 7.36    |
| 15           | 0.50    | 3.84         | 7.70    |
| 20           | 0.34    | 3.13         | 9.17    |

**Supplemental Figure 1:** A) Workflow of native MNase ChIP-seq protocol B) Overview of the pipeline to identify centromeric *k*-mers and sequences that contain centromeric *k*-mers. There are three inputs. The two at the top are reads that will be compared by *k*-mer content (i.e a ChIP dataset vs an input dataset). The third input, on the left, is a set of sequences that will be sorted by presence of centromeric *k*-mers. C) Scatter plots similar to Figure 1A. Scatter plots of normalized *k*-mer count in Cenpa ChIP (y-axis) vs input (x-axis) for *k*-mer lengths 10bp (left), 15bp (center), and 20bp (right). D) Table of the percentage of reads from Cenpa and Input sequencing libraries with increasingly stringent cutoff based on Cenpa / Input *k*-mer counting. Final column is the fold enrichment of the fraction of reads in Cenpa / Input. Multiples of median absolute deviations (MAD $\times$ ) above the median enrichment value used for defining enrichment cutoff as described for Fig 3A,B.

# Fig S2

A

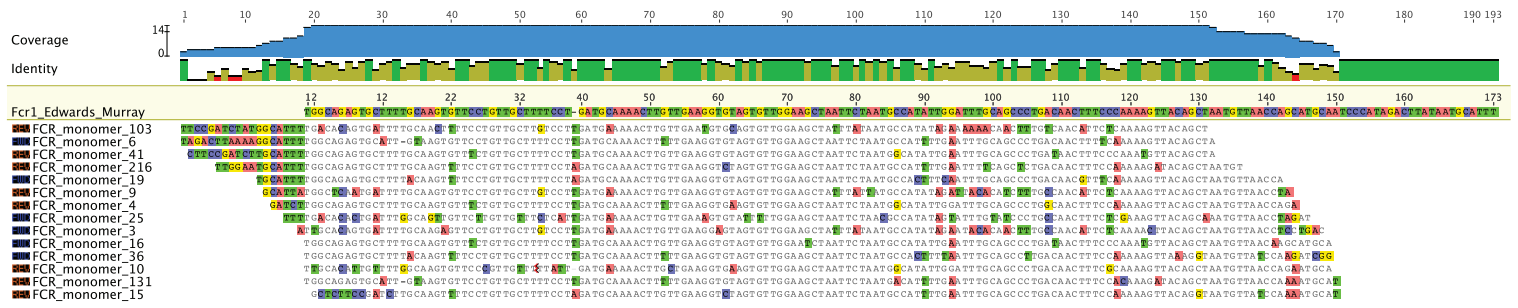

B

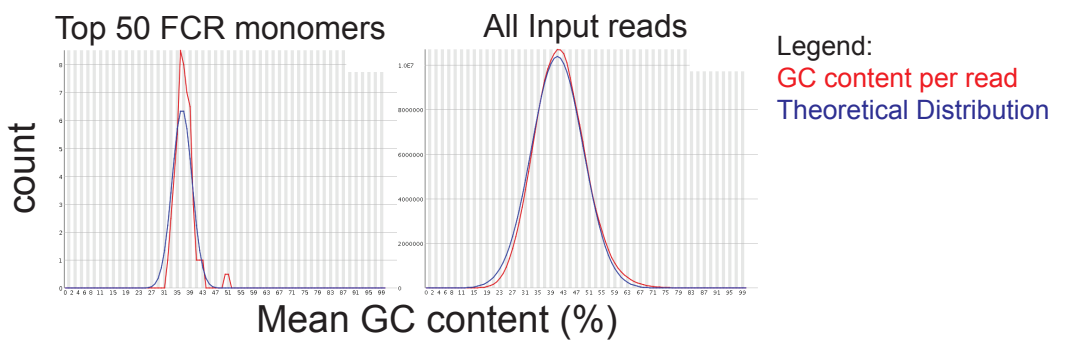

C

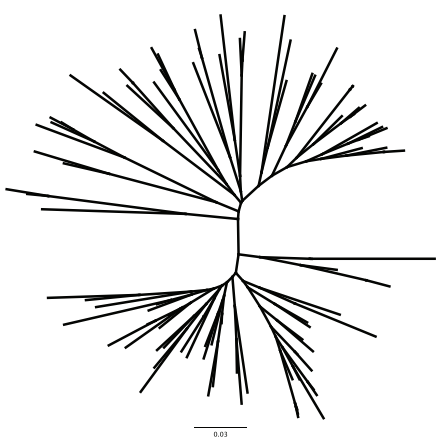

D

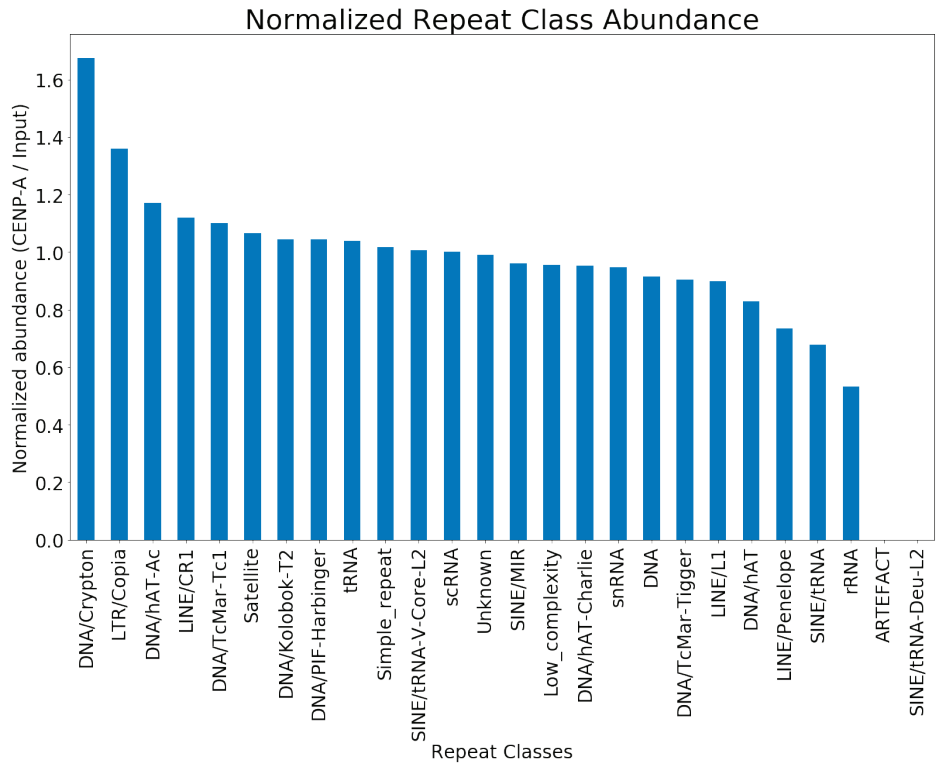

**Supplemental Figure 2:** A) Alignment of select 150bp reads identified as FCR monomers used for FISH to the Fcr1 sequence. Colored base pairs indicate deviation from Fcr1. Coverage and percent identity of FCR monomers across the Fcr1 sequence plotted above. B) Histogram of GC-content for top 50 FCR monomers used to generate phylogram in Figure 1B (left). Histogram of GC-content for all input reads (right). GC-count per read shown in red and theoretical GC content distribution shown in blue. Plot generated using FASTQC. C) Phylogram of representative repeat monomers identified by TRF in centromeric regions from *Xenopus laevis* genome v10.2 D) Barplot of repeat classes enriched in sequencing reads from Cenpa / Input libraries. RepeatMasker was used to identify repeat classes present in 20M Cenpa and Input sequencing reads. An enrichment value for Cenpa/Input was determined for each repeat class.

# Fig S3

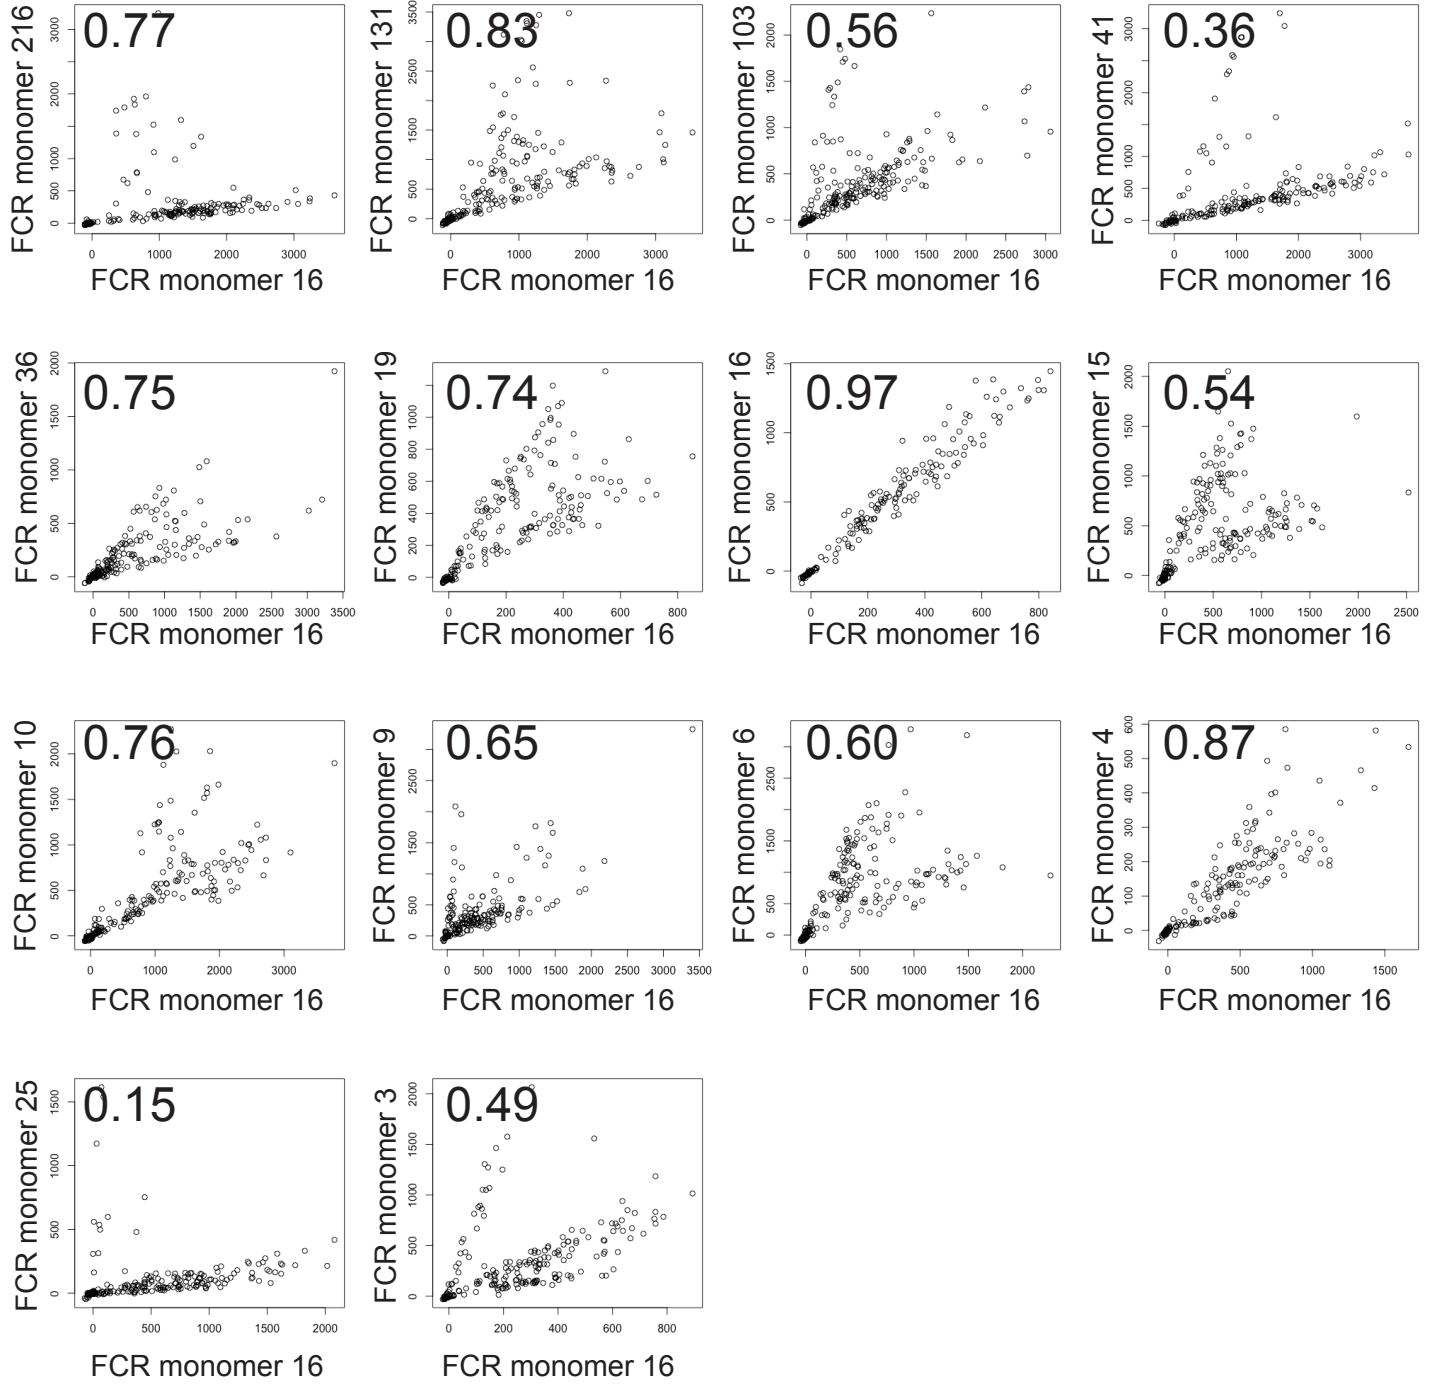

**Supplemental Figure 3:** Scatter plots similar to Figure 2A',B',C'. Scatter plots of background subtracted probe intensities for each centromere from two-color FISH experiments. Pearson coefficients are displayed in the top left corner. These scatter plots have FCR monomer 16 on the x-axis compared to other FCR monomers tested on the y-axis.

# Fig S4

A

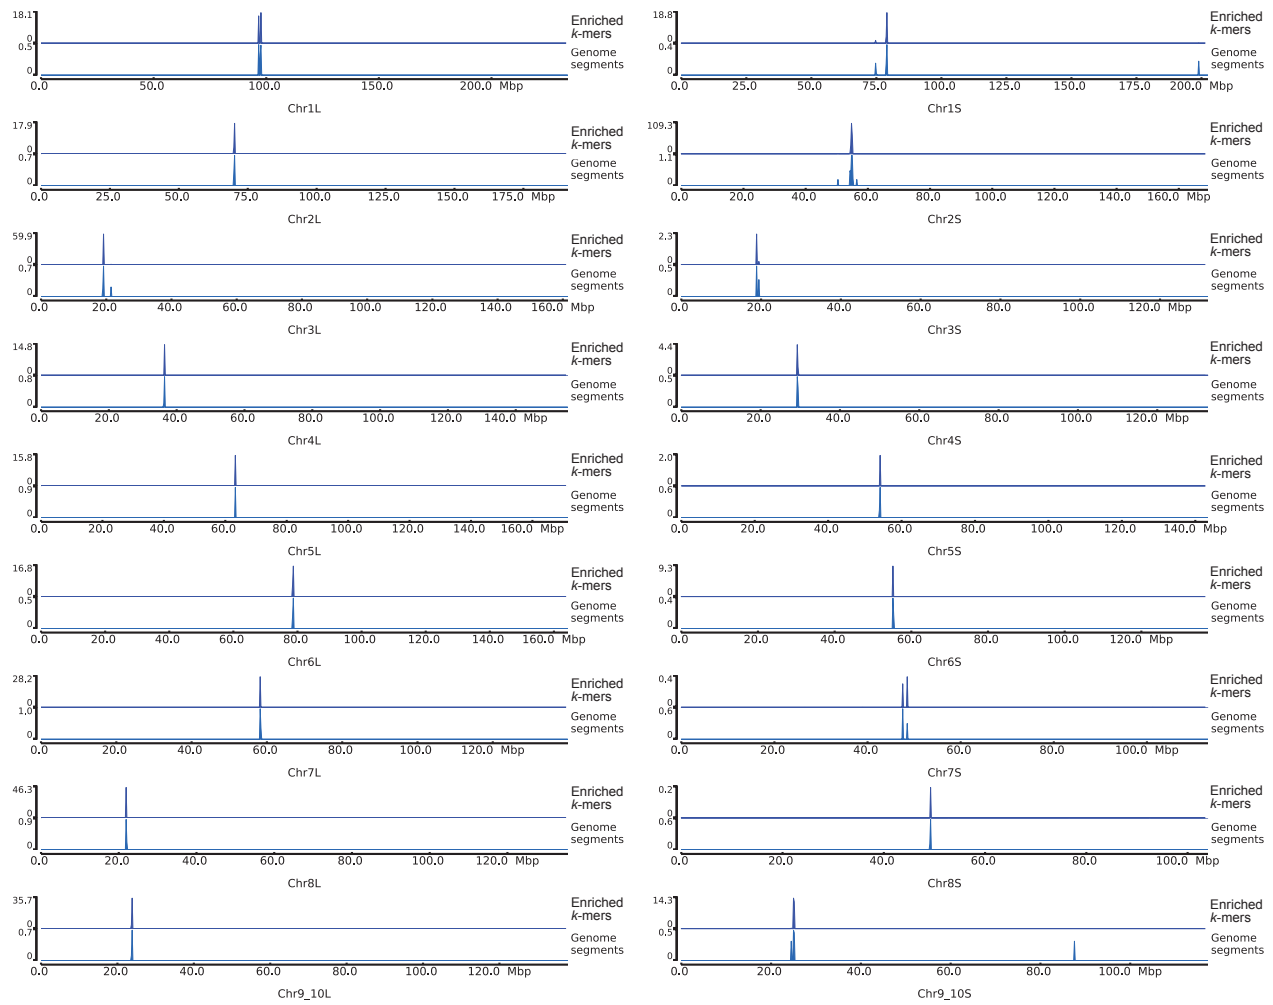

| Chr1L | Chr1S | Chr2L | Chr2S | Chr3L | Chr3S | Chr4L | Chr4S | Chr5L | Chr5S | Chr6L | Chr6S | Chr7L | Chr7S | Chr8L   | Chr8S | Chr9_10L | Chr9_10S |
|-------|-------|-------|-------|-------|-------|-------|-------|-------|-------|-------|-------|-------|-------|---------|-------|----------|----------|
| m4    | m4    | m103  | m131  | m41   | m131  | m4    | m25   | m36   | m25   | m16   | m36   | m16   | m9    | FCR_m19 | m25   | m103     | m41      |
| m41   | m41   | m3    | m36   | m16   | m15   | m41   |       | m6    | m19   | m19   | m6    | m19   | m41   | m131    | m9    | m3       | m19      |
| m10   | m10   |       | m6    | m4    | m216  | m19   |       | m216  | m41   | m41   | m216  | m25   | m16   | m15     |       | m9       | m16      |
| m16   |       |       | m216  |       | m36   | m16   |       | m15   | m9    | m6    | m15   | m41   |       | m216    |       |          |          |
|       |       |       | m15   |       | m41   |       |       | m19   |       |       | m19   | m9    |       | m36     |       |          |          |
|       |       |       | m19   |       | m6    |       |       |       |       |       |       |       |       | m41     |       |          |          |
|       |       |       |       |       |       |       |       |       |       |       |       |       |       | m6      |       |          |          |

B

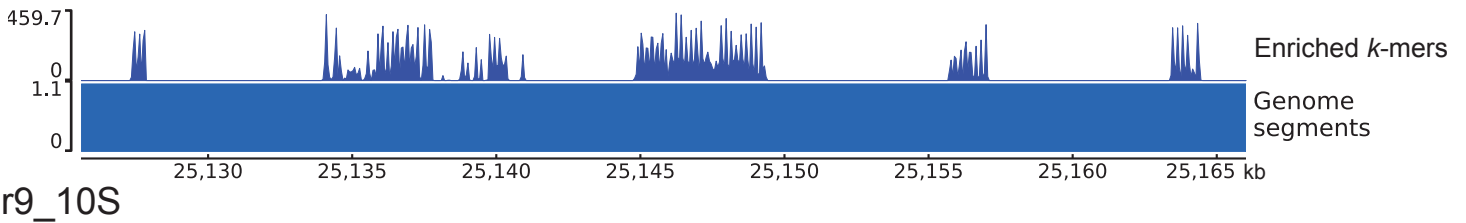

C

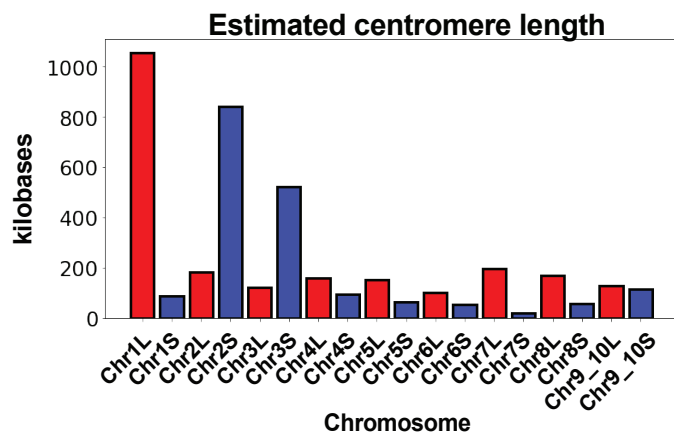

D

| Chromosome | estimated centromere length (bp) | bp with CA enriched k-mer | % with CA enriched k-mers |
|------------|----------------------------------|---------------------------|---------------------------|
| Chr1L      | 1,056,015                        | 31,455                    | 2.98                      |
| Chr1S      | 86,693                           | 23,907                    | 27.58                     |
| Chr2L      | 182,310                          | 52,486                    | 28.79                     |
| Chr2S      | 842,374                          | 107,737                   | 12.79                     |
| Chr3L      | 119,351                          | 16,854                    | 14.12                     |
| Chr3S      | 522,430                          | 1,146                     | 0.22                      |
| Chr4L      | 159,399                          | 7,025                     | 4.41                      |
| Chr4S      | 94,354                           | 1,439                     | 1.53                      |
| Chr5L      | 152,334                          | 7,834                     | 5.14                      |
| Chr5S      | 62,198                           | 974                       | 1.57                      |
| Chr6L      | 102,125                          | 10,792                    | 10.57                     |
| Chr6S      | 51,297                           | 4,400                     | 8.58                      |
| Chr7L      | 196,190                          | 11,230                    | 5.72                      |
| Chr7S      | 20,178                           | 180                       | 0.89                      |
| Chr8L      | 169,395                          | 20,141                    | 11.89                     |
| Chr8S      | 57,730                           | 39                        | 0.07                      |
| Chr9_10L   | 128,980                          | 31,307                    | 24.27                     |
| Chr9_10S   | 114,741                          | 10,037                    | 8.75                      |



**Supplemental Figure 4:** A) Chromosome overviews showing the entire scaffold for each chromosome in *Xenopus laevis* genome. Top track is alignment of enriched 25bp *k*-mers, defined as 17 Median Absolute Deviations above the median of all Cenpa/Input enrichment values. Bottom track is 50kb genome segments that contain enriched *k*-mers. Most chromosomes have one location where enriched *k*-mers map. Below, table with the FCR monomers expected to be most prevalent on each chromosome based on Fig 4D. B) Expanded genome browser view of the centromeric region on Chromosome 9\_10S showing that arrays of repetitive regions identified in this study are interspersed with other sequences. These intervening sequences could be repetitive or non-repetitive, but do not contain Cenpa enriched *k*-mers. C) Barplot of centromere size on each chromosome in kilobases. Exact size of the centromeric repetitive array is estimated by identifying the distance between the first and last base pairs that have a Cenpa enriched *k*-mer aligned per chromosome. These estimates include the intervening sequences between centromeric repetitive arrays shown in Fig S3B, D) Chart of the centromere length (as defined in C), base pairs with Cenpa enriched *k*-mers, and percentage of centromere that contain Cenpa enriched *k*-mers for each chromosome.

# Fig S5

A

| motif             | annotation    | observed | expected   | fold    | pvalue   | qvalue   |
|-------------------|---------------|----------|------------|---------|----------|----------|
| NTTCGNNNNANNCGGGN | xla_v10.2_cen | 1708     | 2813.256   | 0.6073  | 1.00E-03 | 1.00E-03 |
| NTTCGNNNNANNCGGGN | hg38_ucsc_cen | 2191001  | 110130.436 | 19.8944 | 1.00E-03 | 1.00E-03 |

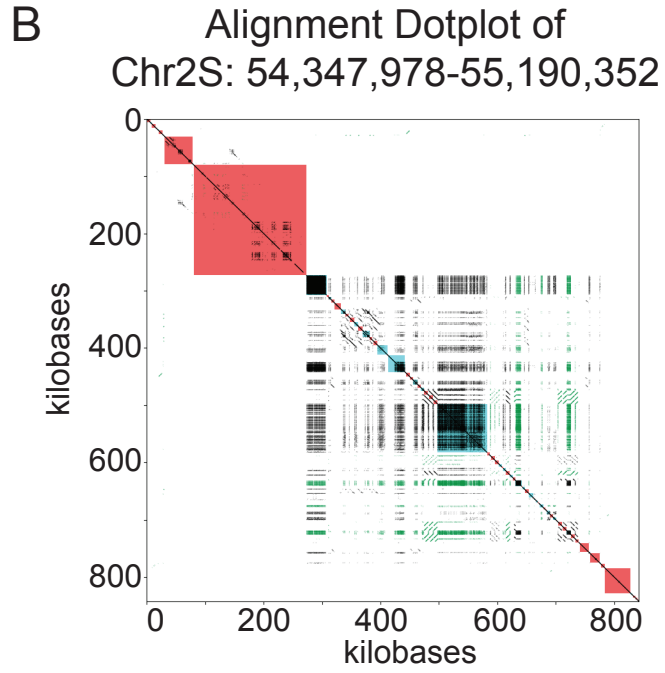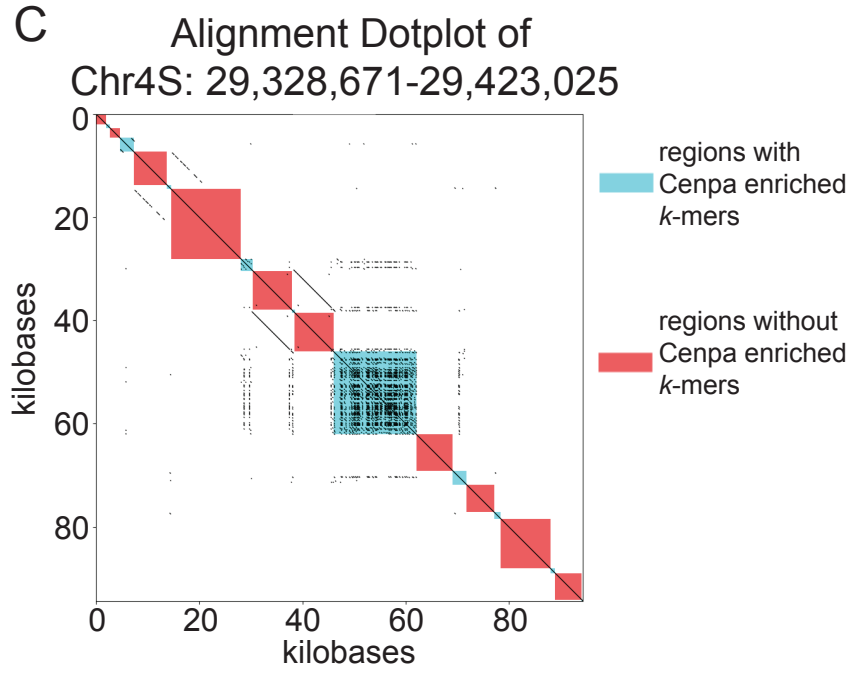

**Supplemental Figure 5:** A) Table showing the observed, expected, and ratio of observed/expected (“fold”) for the number of occurrences of the CENPB motif within the regions defined as the centromere, based on the presence of Cenpa enriched *k*-mers (Fig S4D), in *Xenopus laevis* v10.2 genome and in human hg38 genome based on UCSC centromere annotations. B,C) Self dotplots of centromeric regions identified by Cenpa enriched *k*-mers on Chr2S (B) and Chr4S (C). Window size is 150bp. Matches are depicted black and reverse matches are depicted in green. Off-diagonal signal indicates non-unique sequence. Cyan boxes overlay regions with Cenpa enriched *k*-mers and red boxes overlay regions without Cenpa enriched *k*-mers. X and y axis coordinates are bp relative to the start of each centromeric region.

# Fig S6

A

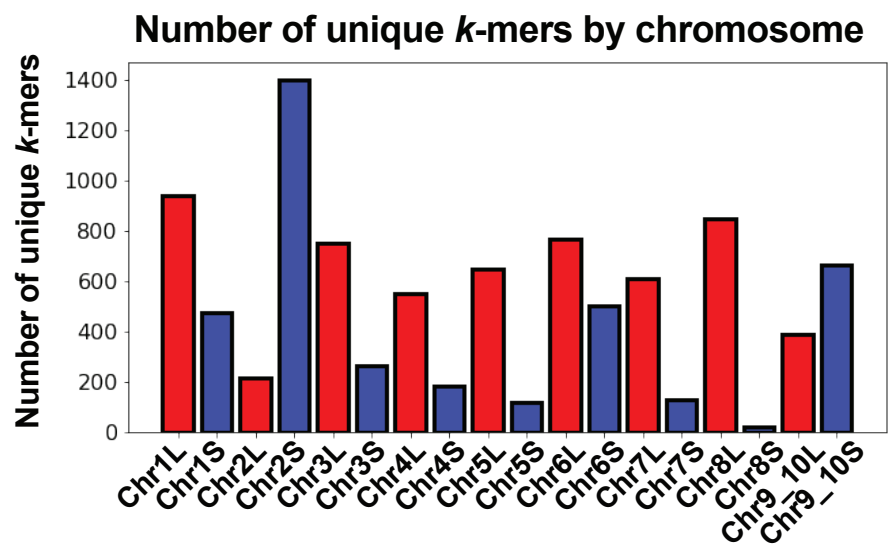

B

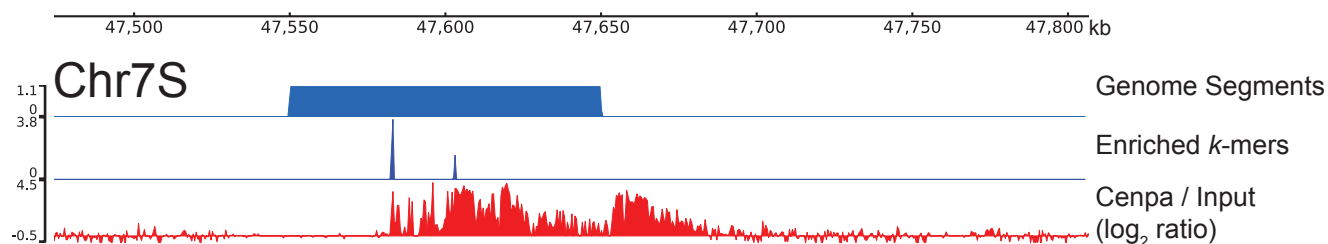

C

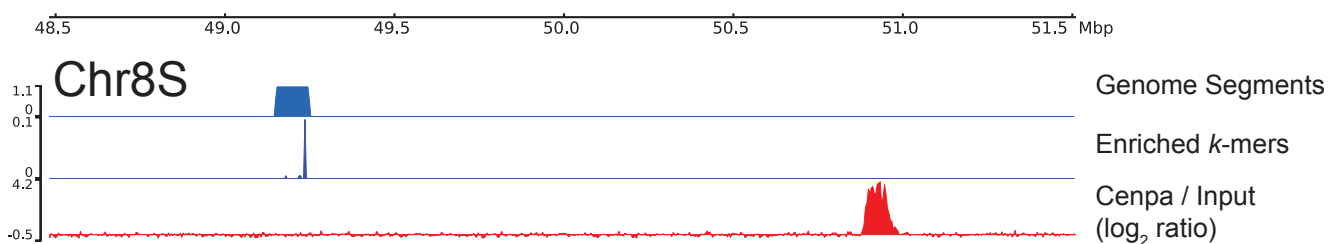

D

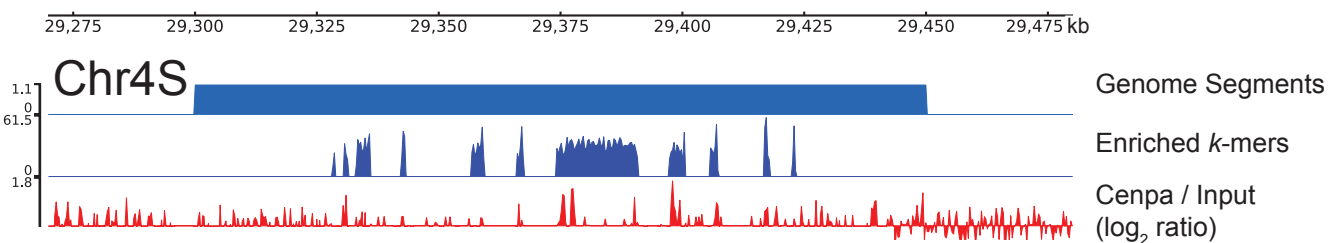

E

Alignment Dotplot of  
Chr7S *k*-mer region:  
47,582,934-47,603,112

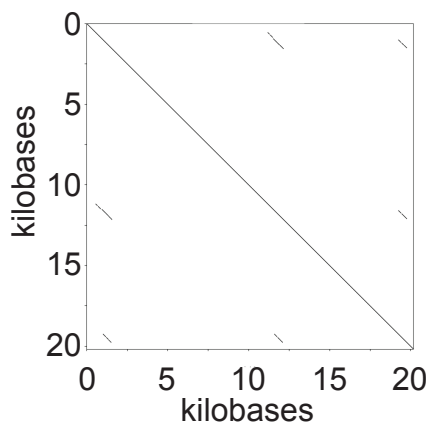

Alignment Dotplot of  
Chr8S *k*-mer region:  
49,180,152-49,237,882

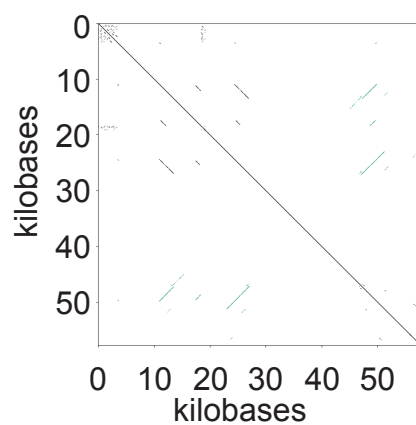

Alignment Dotplot of  
Chr8S Cenpa reads region:  
50,884,697-50,972,722

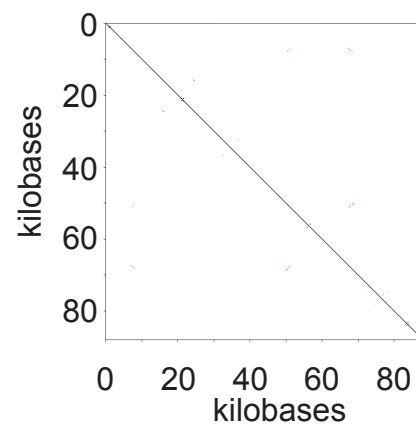

**Supplemental Figure 6:** A) Bar plot of the total number of unique  $k$ -mers found on each chromosome based on centromeric genome segments. Chromosomes from the L subgenome are shown in red and from the S subgenome are shown in blue. B, C, D) Genome browser views depicting location of genome segments containing Cenpa enriched  $k$ -mers (top track), alignment of Cenpa enriched  $k$ -mers (middle track), and a bigwig track depicting the  $\log_2$  ratio of Cenpa / Input reads that were only allowed a single alignment (bottom track) for Chr7S (B), Chr8S (C), and Chr4S (D). E) Self dot plot as for Fig S5B,C with 50bp window size. Region with Cenpa enriched  $k$ -mers on Chr7S (left), region with Cenpa enriched  $k$ -mers on Chr8S (middle), and region with Cenpa enriched reads on Chr8S (right).

Fig S7

# Clustered heatmap of chromosomes and FCR monomers by alignment of specific *k*-mers

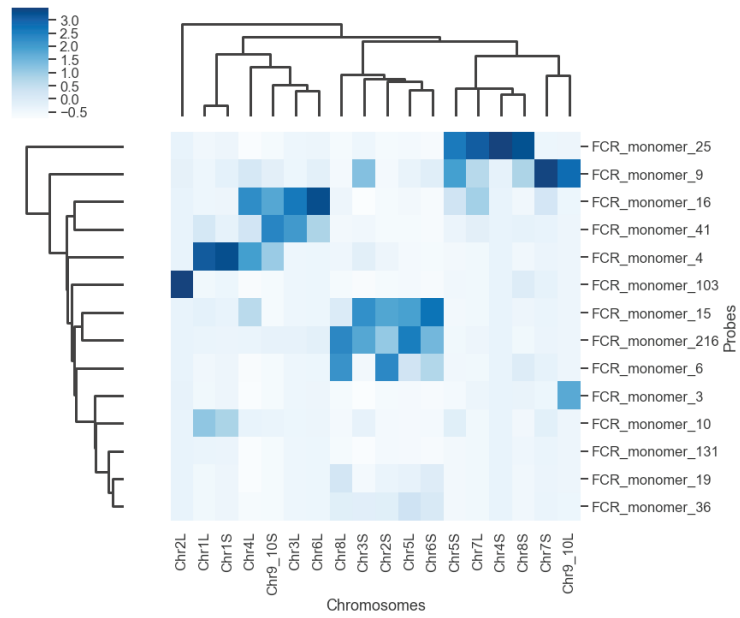

**Supplemental Figure 7:** Heatmap similar to Figure 4C. Clustered heatmap of counts reported from Bowtie of the number of times any unique  $k$ -mer from each FCR monomer aligns to each chromosomal contig. Alignment counts were normalized by the number of  $k$ -mers unique to each FCR monomer.
